# Supplementary material for: Fabrication of superhydrophobic Au–Zn alloy surface on a zinc substrate for roll-down, self-cleaning and anti-corrosion properties
Source: Royal Society of Chemistry journal article supplement (doi:10.1039/c5ta03979g), 2015-01-01
Supplement: c5ta03979g1.pdf [file c5ta03979g1.pdf]

## Supplementary Information

### **Fabrication of superhydrophobic Au-Zn alloys surface on zinc substrate for roll-down, self-cleaning and anti-corrosion properties**

Yuanyuan Cheng<sup>a</sup>, Shixiang Lu<sup>\*a</sup>, Wenguo Xu<sup>\*a</sup>, Huidong Wen<sup>b</sup> and Juan Wang<sup>a</sup>

---

<sup>a</sup> School of Chemistry, Beijing Institute of Technology, Beijing 100081, P.R. China.

E-mail: [shixianglu@bit.edu.cn](mailto:shixianglu@bit.edu.cn); [xuwg60@bit.edu.cn](mailto:xuwg60@bit.edu.cn);

Fax: +86 10 68912631; Tel: +86 10 68912667

<sup>b</sup> MXTronics Corporation, Beijing Microelectronic Technology Institute, Beijing 100076, P.R. China.

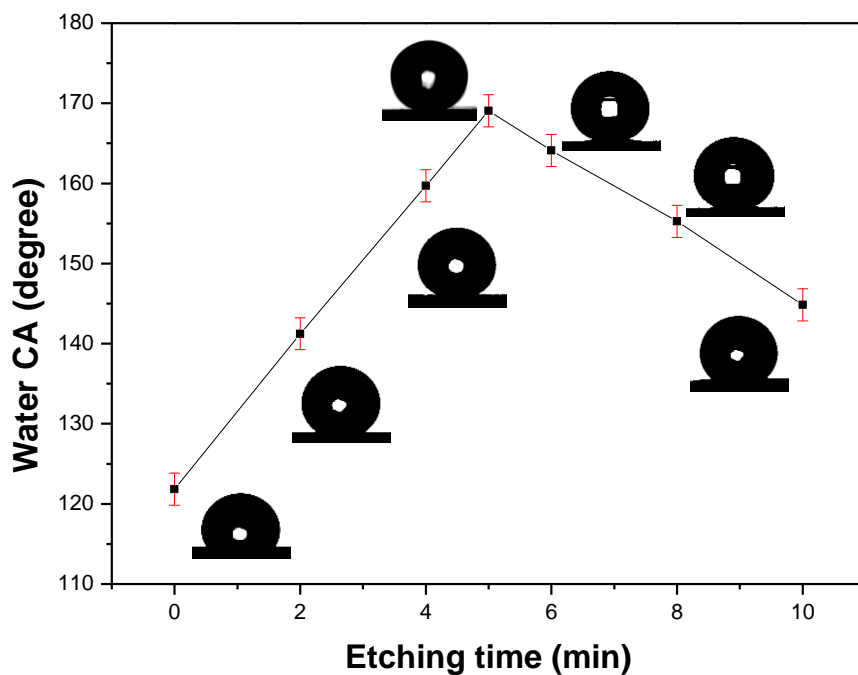

**Fig. S1.** Variation in the static WCAs of sample surfaces with different etching time, while immersed in 5 mmol/L H<sub>2</sub>AuCl<sub>4</sub> solution for 20 min and annealed in an oven at 160°C for 30 min.

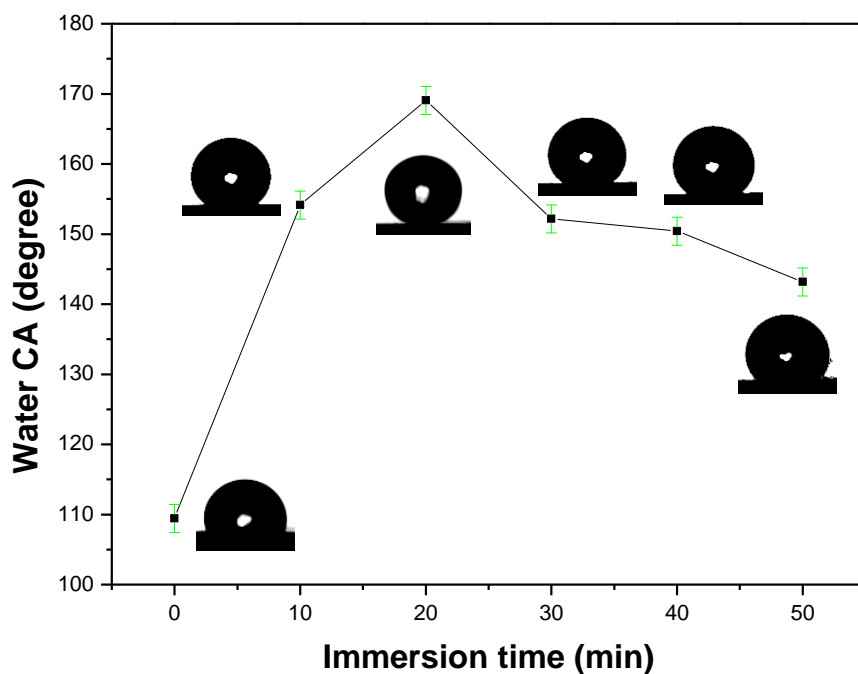

**Fig. S2.** Variation in the static WCAs of sample surfaces with different immersion time, while etched with 1 mol/L NaOH solution for 5 min and annealed in an oven at 160°C for 30 min.

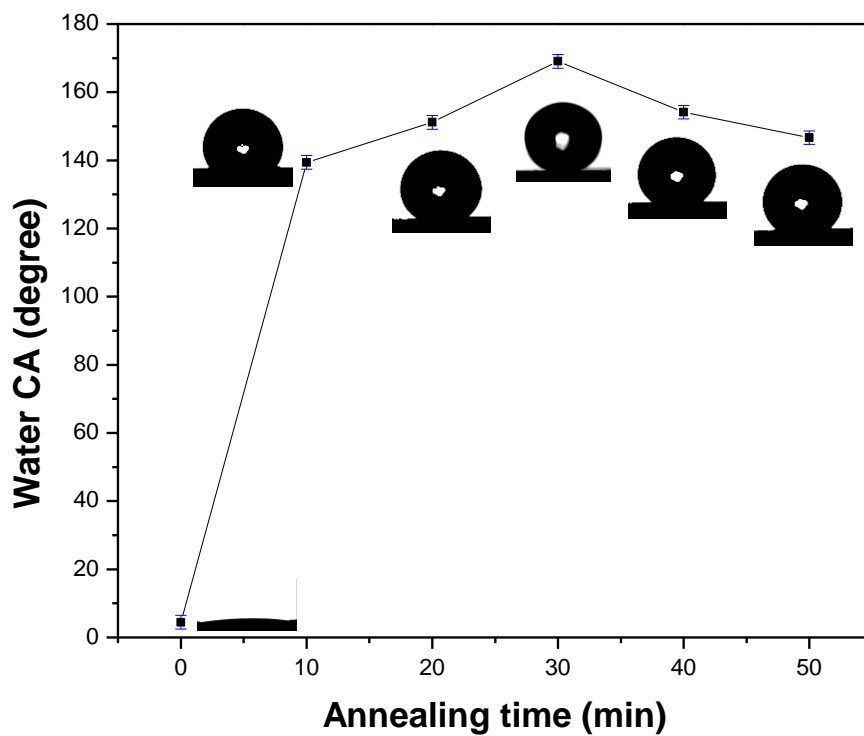

**Fig. S3.** Variation in the static WCAs of sample surfaces with different annealing time, while etched with 1 mol/L NaOH solution for 5 min, immersed in 5 mmol/L HAuCl<sub>4</sub> solution for 20 min and annealed in an oven at 160°C.

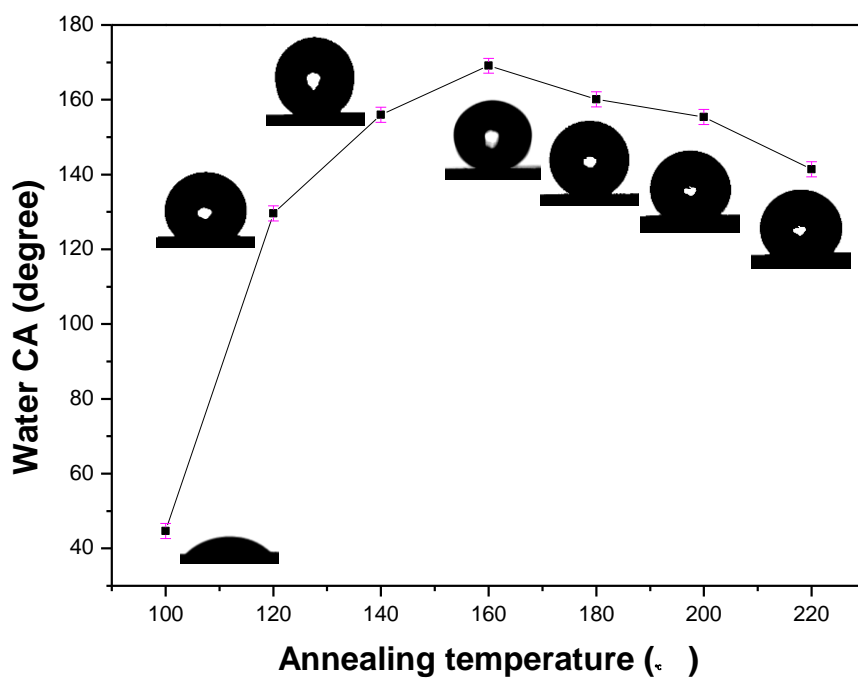

**Fig. S4.** Variation in the static WCAs of sample surfaces with different annealing

temperature, while etched with 1 mol/L NaOH solution for 5 min, immersed in 5 mmol/L HAuCl<sub>4</sub> solution for 20 min and annealed in an oven for 30 min.
